# Supplementary material
Source: MDPI journal article supplement (https://www.mdpi.com/2077-0472/14/4/640)
Supplement: s1 [file s1]

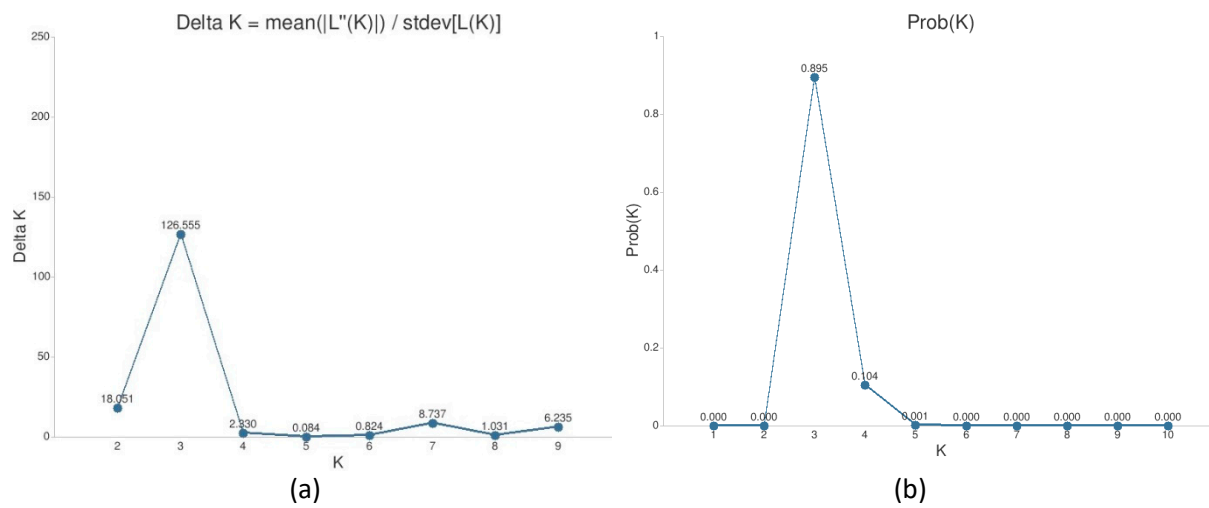

Figure S1: Results of STRUCTURE analyses. (a) Calculating Best K by Evanno. (b) Using median values of Ln Prob of Data to calculate Prob(K=k). Three different genetic groups (populations) were suggested ( $\Delta K = 2$ ). The test was run from K = 1 to 10 using STRUCTURE software.
