# Supplementary material
Source: MDPI journal article supplement (https://www.mdpi.com/2077-0472/14/4/640)
Supplement: s1 [file s1 › Table S1.xlsx]

## Sheet: List1
Table S1: SSR profiles of analyzed samples
Sample name	VVS2_1	VVS2_2	VVMD7_1	VVMD7_2	VVMD5_1	VVMD5_2	VRZAG62_1	VRZAG62_2	VRZAG79_1	VRZAG79_2	VVMD28_1	VVMD28_2	VVMD32_1	VVMD32_2	VVMD25_1	VVMD25_2	VVIV67_1	VVIV67_2	VrZAG83_1	VrZAG83_2	VVIN16_1	VVIN16_2	VVIN73_1	VVIN73_2	VVIP60_1	VVIP60_2	VMC1B11_1	VMC1B11_2	VVIB01_1	VVIB01_2	VVIH54_1	VVIH54_2	VVMD24_1	VVMD24_2	VVMD27_1	VVMD27_2	VVIQ52_1	VVIQ52_2	VRZAG67_1	VRZAG67_2	VVIP31_1	VVIP31_2	VVMD21_1	VVMD21_2	VVIV37_1	VVIV37_2	VMC4f3_1	VMC4f3_2
V1	133	153	239	249	228	242	188	204	237	249	228	248	264	272	239	241	358	365	188	188	149	149	258	266	318	322	171	183	291	295	167	177	206	206	180	195	76	76	135	145	173	193	250	259	156	160	171	171
V2	133	153	249	255	238	240	200	204	247	261	268	278	258	272	241	241	367	373	188	190	147	157	264	264	318	322	183	185	289	295	165	179	206	210	182	190	76	82	135	145	171	177	250	250	160	168	171	181
V3	137	151	239	243	230	240	188	194	239	245	218	236	240	272	239	249	365	373	188	201	149	157	266	268	318	320	167	173	289	295	163	167	212	214	186	190	82	82	122	148	177	181	250	250	150	160	171	177
V4	133	151	247	253	234	242	192	204	251	251	236	268	264	272	241	249	362	373	188	188	149	151	258	264	322	332	173	183	289	291	163	177	204	206	190	195	82	82	145	155	191	193	244	250	160	166	171	181
V5	131	133	239	253	242	248	192	196	251	251	246	268	256	264	239	241	358	362	188	190	149	151	258	264	322	332	183	185	291	295	151	163	204	210	184	195	82	82	145	145	177	193	244	250	166	166	165	181
V6	135	151	247	257	228	240	194	196	251	251	246	258	240	272	255	269	362	365	188	195	149	151	266	266	318	322	171	183	291	299	163	167	210	215	186	190	76	82	135	135	171	173	250	250	150	160	171	171
V7	131	151	247	253	228	242	192	204	251	251	228	246	264	272	239	249	358	373	188	190	149	149	258	264	322	322	183	185	291	295	151	177	204	206	190	195	82	82	122	145	177	191	250	250	160	160	171	181
V8	133	153	239	239	230	240	188	196	249	259	242	254	264	272	239	241	358	365	190	192	149	149	258	266	318	326	171	185	295	295	165	167	206	215	182	195	76	82	145	155	187	193	250	257	160	160	165	171
V9	135	143	249	249	228	230	200	202	251	259	248	260	252	272	255	255	358	366	188	195	147	149	258	266	326	332	167	185	291	295	163	167	206	210	180	186	76	76	128	148	173	175	244	250	156	160	165	203
V10	143	143	239	239	228	242	188	196	237	251	246	260	250	272	255	255	366	366	188	195	149	149	264	266	322	324	183	185	291	295	167	179	206	206	180	195	76	82	135	145	173	185	250	250	160	168	171	186
V11	143	143	239	249	228	242	194	204	237	251	246	246	250	272	249	255	358	366	188	195	149	149	266	268	322	324	169	185	299	299	165	167	206	206	180	195	76	82	135	145	171	173	250	257	150	160	171	203
V12	133	143	239	239	240	248	188	192	251	259	234	236	264	272	239	249	358	365	188	188	149	149	266	266	318	328	183	185	295	295	165	165	206	206	180	182	78	82	135	145	181	193	257	259	156	168	165	208
V13	143	151	249	257	240	242	194	204	237	245	228	234	240	272	249	255	363	366	188	201	149	151	266	266	318	322	167	185	289	295	163	167	206	214	180	190	76	82	135	145	173	187	250	250	160	160	171	171
V14	133	143	253	255	228	230	192	204	251	255	248	260	252	264	255	255	362	366	188	195	149	149	264	268	324	332	169	185	291	295	167	167	206	206	180	195	76	76	145	145	171	193	250	250	150	160	181	203
V15	151	151	243	257	234	240	188	194	245	251	234	236	240	272	249	249	365	373	188	201	149	157	266	266	306	320	171	173	289	295	163	163	210	214	190	190	76	82	122	128	177	187	250	250	160	160	171	177
V16	133	135	239	239	230	242	194	196	247	249	236	248	264	272	239	255	358	365	188	188	149	149	258	266	320	326	173	185	295	295	163	165	206	215	190	195	78	82	128	145	173	175	244	250	150	160	165	171
V17	133	143	239	249	236	242	196	204	237	243	228	246	250	272	239	255	365	366	188	195	149	149	266	266	322	324	171	185	295	299	149	167	206	206	180	182	76	82	135	135	173	181	250	250	160	168	171	171
V18	133	153	239	239	228	236	188	196	237	257	246	248	272	272	239	241	358	365	188	190	149	149	258	266	318	322	183	185	291	299	149	165	206	215	180	195	76	82	135	145	181	193	244	250	156	160	171	171
V19	133	135	247	255	228	228	188	204	249	251	228	260	272	272	239	255	358	365	188	190	149	149	258	264	318	318	183	185	295	295	163	167	206	206	186	195	76	78	145	155	175	185	250	250	160	160	165	165
V20	143	151	239	239	230	236	194	196	237	245	228	236	240	250	249	255	365	373	195	201	149	149	266	268	318	322	167	185	289	295	167	167	206	212	180	190	82	82	122	135	181	181	250	250	160	168	171	177
V21	135	143	239	247	236	242	194	196	251	251	228	234	252	256	255	255	368	376	190	195	149	151	258	258	320	320	169	183	295	295	139	163	206	210	180	184	76	82	145	145	175	181	244	250	150	160	177	226
V22	133	145	247	249	234	242	204	204	237	259	234	248	248	258	239	241	367	367	190	195	149	151	258	258	318	330	171	185	291	295	139	165	206	206	180	182	78	82	135	150	173	181	250	257	156	160	171	171
V23	133	133	239	249	238	248	186	188	251	255	234	268	266	272	239	241	365	376	188	188	147	149	266	266	318	328	185	189	295	295	165	165	206	210	180	180	76	78	135	135	183	193	257	267	160	168	206	208
V24	133	133	239	239	230	242	188	196	243	249	228	236	264	272	239	239	365	366	188	188	147	149	266	266	318	324	171	185	295	299	149	167	206	210	182	195	76	82	135	145	181	187	250	250	160	160	171	171
V25	143	151	243	255	228	234	188	204	249	259	228	260	252	272	249	249	362	373	190	195	149	151	258	268	306	324	173	175	295	299	167	177	206	214	182	195	76	82	122	128	171	191	250	259	150	160	171	171
V26	133	133	239	249	228	236	204	204	237	249	246	248	264	272	239	239	358	365	188	188	149	149	266	266	318	322	171	185	291	295	149	177	206	206	180	195	76	82	135	145	181	193	244	250	156	160	171	171
V27	133	133	239	249	236	248	196	204	237	259	246	248	264	272	239	239	365	365	188	188	149	149	266	266	322	326	167	185	295	295	163	167	206	215	180	182	76	82	135	155	173	187	250	250	160	168	165	171
V28	135	143	239	239	236	248	188	196	237	249	228	236	250	256	255	255	366	366	190	195	149	149	266	266	322	326	171	185	295	295	149	163	206	210	180	195	78	82	135	145	175	181	250	250	160	168	165	171
V29	143	155	239	247	228	228	194	196	249	259	234	246	250	272	243	255	358	360	188	195	149	149	258	266	318	322	183	185	291	295	177	187	206	214	180	195	76	76	135	145	173	181	257	259	158	160	171	171
V30	133	151	239	247	228	242	188	204	251	259	244	246	252	256	239	263	362	365	190	195	151	151	266	266	318	322	173	185	291	295	163	165	204	206	180	182	78	82	145	145	181	187	244	250	160	162	171	188
V31	133	135	239	239	230	248	188	196	249	259	236	248	256	264	239	255	358	365	188	190	147	149	266	266	318	326	167	185	295	295	163	167	210	215	182	195	78	82	145	155	175	187	250	250	160	160	165	171
V32	133	133	243	253	242	242	188	192	245	251	234	246	264	272	239	241	362	373	190	190	149	157	258	266	318	332	171	185	295	295	163	163	210	210	190	195	82	82	145	155	177	193	250	250	148	160	165	169
V33	133	143	239	255	228	228	188	204	249	251	228	260	264	272	255	255	366	366	188	188	149	149	260	264	324	328	183	185	291	291	167	179	206	210	184	195	76	76	128	145	171	185	250	257	160	168	185	203
UN1	139	143	247	247	228	236	194	204	237	245	228	268	240	252	239	239	365	368	201	201	149	157	266	266	320	322	171	173	291	295	163	165	204	206	186	190	78	78	135	145	177	181	250	250	150	160	177	177
UN2	133	153	239	247	240	242	204	204	243	249	246	278	272	272	239	241	358	365	188	190	149	149	258	266	318	322	171	185	291	295	149	177	206	206	182	195	76	82	135	155	173	193	244	250	160	168	171	171
UN3	133	143	239	255	228	242	196	204	237	251	246	260	272	272	239	255	366	366	188	195	149	149	264	266	322	324	171	183	291	295	167	179	206	210	180	195	76	82	135	145	181	185	250	257	160	160	171	203
UN4	133	133	247	249	240	242	204	204	237	257	228	248	264	272	239	241	366	366	188	190	149	149	258	266	318	324	183	185	291	299	167	175	206	206	180	195	76	76	135	145	185	193	244	250	156	168	171	171
UN5	135	143	239	239	228	230	188	196	249	249	248	260	256	272	255	255	358	366	188	190	149	149	260	266	326	328	167	185	291	295	167	167	206	210	184	195	76	82	128	155	185	187	250	257	160	168	165	203
UN6	141	151	249	257	240	242	194	204	237	245	228	234	240	272	249	255	363	366	188	201	149	151	266	266	318	322	167	185	289	295	163	167	206	214	180	190	76	82	135	145	173	187	250	250	160	160	171	171
UN7	133	133	239	249	236	240	188	204	251	251	228	234	264	272	239	241	365	366	188	188	149	149	266	266	328	332	175	183	295	295	165	165	206	206	180	186	78	82	128	145	189	193	250	259	160	168	165	167
UN8	133	143	239	239	228	236	188	196	237	251	228	246	264	272	255	255	366	366	188	195	149	149	260	266	322	328	185	185	291	295	167	167	206	206	180	195	76	76	135	145	171	181	250	257	160	168	171	203
UN9	133	135	249	253	236	242	188	204	243	251	246	268	250	272	239	255	366	376	188	195	149	151	266	266	324	324	175	185	295	295	149	165	206	210	182	184	76	82	135	145	177	181	250	259	166	168	165	171
UN10	133	143	239	255	228	236	196	204	243	249	228	260	250	264	255	255	366	366	188	195	149	149	264	266	322	324	185	185	291	299	149	179	206	206	182	184	76	82	128	135	173	185	250	257	160	168	171	203
UN11	133	133	239	239	230	236	196	196	243	249	236	246	256	272	239	239	365	365	188	190	149	149	266	266	324	326	167	171	295	299	167	167	206	215	182	195	76	82	135	155	175	181	250	250	160	160	165	171
UN12	133	143	239	239	228	240	188	188	259	259	228	236	256	272	239	249	358	365	188	201	149	151	266	266	318	318	185	197	295	295	165	165	206	206	180	182	78	82	122	135	181	181	250	259	150	168	206	208
UN13	135	143	239	249	228	236	196	202	243	259	246	260	252	272	255	255	358	365	188	195	149	149	258	266	322	326	167	185	295	299	167	167	206	210	180	182	76	82	135	148	173	181	244	250	156	160	165	171
UN14	133	143	239	253	230	248	192	204	251	251	246	260	264	272	239	255	362	373	190	190	149	149	264	268	318	332	175	185	291	295	151	167	202	204	184	195	76	82	128	145	181	193	250	250	150	150	182	182
UN15	149	153	249	249	228	242	200	204	249	259	248	260	252	272	241	249	358	366	188	195	149	149	266	266	318	322	169	171	295	295	167	177	206	206	180	195	76	76	145	145	171	193	244	259	150	160	171	171
UN16	133	133	239	249	228	242	188	204	243	257	228	249	250	264	239	239	366	366	190	195	149	149	266	266	318	322	171	185	291	299	149	177	206	215	182	195	76	82	135	155	173	175	250	259	160	168	171	171
UN17	133	133	247	249	228	242	204	204	243	249	228	278	250	264	239	239	366	366	190	195	149	149	266	266	318	322	183	185	291	299	165	167	206	215	182	195	76	76	135	155	173	193	244	250	160	160	171	171
UN18	133	133	239	247	236	240	196	204	243	249	228	278	264	272	237	239	362	365	190	190	149	149	266	266	318	318	171	185	291	295	149	165	206	215	182	195	76	82	135	145	173	193	244	250	156	160	165	171
UN19	135	143	239	239	230	236	188	196	243	249	228	248	256	272	255	255	365	365	190	190	149	149	266	266	318	322	171	185	295	299	149	167	206	215	182	195	78	82	135	145	179	189	249	249	160	168	173	177
UN20	133	143	239	239	228	242	188	196	243	251	228	228	264	272	239	255	366	366	188	188	149	149	264	266	322	328	171	185	291	299	167	167	206	210	182	195	76	76	124	135	173	173	250	257	160	168	175	186
UN21	133	135	239	249	198	200	194	198	241	257	246	260	240	252	237	253	365	365	188	195	149	151	258	266	322	326	183	185	295	297	165	169	206	210	180	180	76	76	135	147	173	181	244	250	156	160	180	186
UN22	133	133	239	249	228	242	196	204	247	247	228	248	264	272	239	241	358	365	188	188	149	149	258	266	322	322	171	183	291	295	163	169	206	206	180	195	76	76	135	135	177	179	250	250	150	160	171	171
UN23	133	133	239	249	228	236	188	204	237	247	246	246	262	272	239	239	358	365	188	188	149	149	266	266	318	322	171	185	291	295	165	165	206	215	180	184	76	76	133	143	181	193	244	250	156	160	171	171
UN24	133	151	239	239	236	248	194	204	237	237	246	246	238	240	239	255	365	365	188	188	151	151	266	266	324	326	183	189	295	295	163	169	206	215	180	195	76	76	135	152	179	187	250	250	150	160	171	181
UN25	133	133	249	253	242	242	192	194	243	249	246	268	250	272	239	255	365	376	195	201	149	151	266	266	324	324	185	185	295	295	163	169	206	210	180	195	76	76	135	135	177	183	241	259	166	168	165	171
UN26	133	153	239	247	240	242	188	204	243	249	246	278	272	272	239	241	358	365	188	190	149	149	258	266	318	322	171	185	291	295	163	177	206	206	182	195	76	76	133	152	177	177	244	250	160	168	171	171
UN27	135	135	239	239	0	0	194	204	247	247	236	248	256	256	239	241	358	358	188	188	151	151	0	0	318	318	183	183	295	295	163	169	206	215	186	195	76	76	137	143	185	187	250	250	160	174	165	171
UN28	135	143	249	255	228	242	194	204	249	265	246	260	272	272	237	253	365	365	188	195	151	151	264	266	320	322	171	183	295	295	169	179	206	210	180	195	76	76	133	143	181	185	250	257	160	160	171	203
UN29	133	139	263	263	228	242	194	204	245	257	228	236	240	258	239	255	373	373	195	201	151	153	266	270	314	324	185	189	291	291	163	169	206	206	182	190	76	76	133	133	185	187	249	259	150	160	171	177
UN30	133	133	239	247	242	242	194	194	255	257	236	246	256	272	237	255	358	363	188	188	149	149	266	266	318	324	167	185	295	295	163	169	206	215	180	180	76	76	135	145	171	173	250	250	160	160	165	171
UN31	133	133	237	255	228	236	194	196	241	241	228	260	250	264	253	255	365	365	180	195	151	151	264	266	322	324	185	185	291	299	163	169	206	206	184	190	76	76	118	126	181	185	239	257	160	168	171	203
UN32	133	135	237	237	230	230	194	196	245	245	236	236	256	264	237	253	358	365	188	190	149	151	266	266	318	326	167	185	295	295	163	169	210	215	182	195	76	76	145	152	183	185	250	250	160	158	165	171
UN33	133	143	249	249	228	230	194	194	0	0	0	0	272	272	241	255	365	365	188	195	149	149	266	268	324	332	183	185	295	295	165	167	206	210	182	190	76	80	147	152	173	201	250	250	160	160	0	0
UN34	133	143	253	261	228	228	194	196	249	251	228	260	240	264	237	253	365	365	188	188	151	151	260	264	324	328	183	185	291	291	167	179	206	210	190	195	76	82	135	145	181	185	250	257	160	168	185	203
UN35	143	151	249	257	240	242	194	204	237	245	228	234	240	272	249	255	362	365	188	201	149	151	266	266	318	322	167	185	289	295	163	167	206	214	180	190	76	82	137	145	173	187	250	250	160	160	158	171
UN36	133	153	239	249	228	238	188	200	245	251	228	278	258	264	239	241	365	365	188	190	151	153	266	266	322	328	185	185	295	299	165	167	206	210	182	190	76	76	130	147	171	171	250	250	160	168	171	185
UN37	133	153	239	247	240	242	188	204	243	249	246	278	272	272	239	241	358	365	188	190	149	149	258	266	318	322	171	185	291	295	151	177	206	206	182	195	76	82	133	141	173	193	244	250	160	168	173	188
