# Supplementary material
Source: MDPI journal article supplement (https://www.mdpi.com/2077-0472/14/4/640)
Supplement: s1 [file s1 › Table S2.xlsx]

## Sheet: Sheet1
Table S2: List of samples used in this study
Sample name	Population	Nummer		Slovenian name	Prime name	VIVC number	Country of sampling	Species
V1	1	1	ref	Šipon	FURMINT	4292	Slovenia	V. vinifera L. subsp. sativa (DC.) Hegi
V2	1	2	historical varieties	Zametovka	KOELNER BLAU	6344	Slovenia	V. vinifera L. subsp. sativa (DC.) Hegi
V3	1	3	ref	Modri pinot	PINOT NOIR	9279	Slovenia	V. vinifera L. subsp. sativa (DC.) Hegi
V4	1	4	historical varieties	Rani rdeči veltlinec	VELTLINER FRUEHROT	16157	Slovenia	V. vinifera L. subsp. sativa (DC.) Hegi
V5	1	5	historical varieties	Rdeči veltlinec	VELTLINER ROT	12931	Slovenia	V. vinifera L. subsp. sativa (DC.) Hegi
V6	1	6	ref	Laški rizling	WELSCHRIESLING	13217	Slovenia	V. vinifera L. subsp. sativa (DC.) Hegi
V7	1	7	historical varieties	Neuburger	NEUBURGER	8501	Slovenia	V. vinifera L. subsp. sativa (DC.) Hegi
V8	1	8	historical varieties	Modri naprstnik	AUGSTER BLAU	765	Slovenia	V. vinifera L. subsp. sativa (DC.) Hegi
V9	1	9	historical varieties	Zagajec	BATTTRAUBE	1041	Slovenia	V. vinifera L. subsp. sativa (DC.) Hegi
V10	1	10	historical varieties	Velika črnina	BETTLERTRAUBE	1296	Slovenia	V. vinifera L. subsp. sativa (DC.) Hegi
V11	1	11	historical varieties	Frankinja	BLAUFRAENKISCH	1459	Slovenia	V. vinifera L. subsp. sativa (DC.) Hegi
V12	1	12	historical varieties	Beli kozjak	COARNA ALBA	2724	Slovenia	V. vinifera L. subsp. sativa (DC.) Hegi
V13	1	13	historical varieties	Peček	ELBLING WEISS	3865	Slovenia	V. vinifera L. subsp. sativa (DC.) Hegi
V14	1	14	historical varieties	Gosjenog	GAENSFUESSER BLAU	586	Slovenia	V. vinifera L. subsp. sativa (DC.) Hegi
V15	1	15	ref	Traminec	GEWUERZTRAMINER	12609	Slovenia	V. vinifera L. subsp. sativa (DC.) Hegi
V16	1	16	historical varieties	Trda belina	HARTHEUNISCH	26178	Slovenia	V. vinifera L. subsp. sativa (DC.) Hegi
V17	1	17	historical varieties	Belina	HEUNISCH WEISS	5374	Slovenia	V. vinifera L. subsp. sativa (DC.) Hegi
V18	1	18	historical varieties	Beli javor	JAVOR WEISS	24944	Slovenia	V. vinifera L. subsp. sativa (DC.) Hegi
V19	1	19	historical varieties	Črni šipon	KADARKA KEK	5898	Slovenia	V. vinifera L. subsp. sativa (DC.) Hegi
V20	1	20	historical varieties	Bela kavka	KNIPPERLE	6312	Slovenia	V. vinifera L. subsp. sativa (DC.) Hegi
V21	1	21	historical varieties	Kraljevina	KRALJEVINA	24904	Slovenia	V. vinifera L. subsp. sativa (DC.) Hegi
V22	1	22	historical varieties	Topolina	LISZTES FEHER	17061	Slovenia	V. vinifera L. subsp. sativa (DC.) Hegi
V23	1	23	historical varieties	Ložinka	PECSI SZAGOS	9075	Slovenia	V. vinifera L. subsp. sativa (DC.) Hegi
V24	1	24	historical varieties	Rumeni plavec	PLAVEC ZUTI	24539	Slovenia	V. vinifera L. subsp. sativa (DC.) Hegi
V25	1	25	historical varieties	Portugalka	PORTUGIESER BLAU	9620	Slovenia	V. vinifera L. subsp. sativa (DC.) Hegi
V26	1	26	historical varieties	Lipna	PRSLJIVKA	24909	Slovenia	V. vinifera L. subsp. sativa (DC.) Hegi
V27	1	27	historical varieties	Ranfol	RANFOL BELI	9908	Slovenia	V. vinifera L. subsp. sativa (DC.) Hegi
V28	1	28	historical varieties	Svetla belina	SVJETLAK	24941	Slovenia	V. vinifera L. subsp. sativa (DC.) Hegi
V29	1	29	historical varieties	Vrbovec	TANTOVINA EICHENBLAETTRIGE	23368	Slovenia	V. vinifera L. subsp. sativa (DC.) Hegi
V30	1	30	historical varieties	Volovnik	VELA PERGOLA	22299	Slovenia	V. vinifera L. subsp. sativa (DC.) Hegi
V31	1	31	historical varieties	Pelesovna	VULPEA	13186	Slovenia	V. vinifera L. subsp. sativa (DC.) Hegi
V32	1	32	historical varieties	Lepa zastavica	ZIERFANDLER ROT	13443	Slovenia	V. vinifera L. subsp. sativa (DC.) Hegi
V33	1	33	historical varieties	Vranek	ZIMMETTRAUBE BLAUSCHWARZ	17807	Slovenia	V. vinifera L. subsp. sativa (DC.) Hegi
UN1	2	34	Unknown	Zelenec	ZELENEC	26014	Slovenia	V. vinifera L. subsp. sativa (DC.) Hegi
UN2	2	35	Unknown	Topolka	-	-	Slovenia	V. vinifera L. subsp. sativa (DC.) Hegi
UN3	2	36	Unknown	Pohorka	-	-	Slovenia	V. vinifera L. subsp. sativa (DC.) Hegi
UN4	2	37	Unknown	Okic	-	-	Slovenia	V. vinifera L. subsp. sativa (DC.) Hegi
UN5	2	38	Unknown	Pikica	-	-	Slovenia	V. vinifera L. subsp. sativa (DC.) Hegi
UN6	2	39	Unknown	Bucanka	-	-	Slovenia	V. vinifera L. subsp. sativa (DC.) Hegi
UN7	2	40	Unknown	Pecovka	-	-	Slovenia	V. vinifera L. subsp. sativa (DC.) Hegi
UN8	2	41	Unknown	Sojek	-	-	Slovenia	V. vinifera L. subsp. sativa (DC.) Hegi
UN9	2	42	Unknown	Habjana	-	-	Slovenia	V. vinifera L. subsp. sativa (DC.) Hegi
UN10	2	43	Unknown	Ticna	-	-	Slovenia	V. vinifera L. subsp. sativa (DC.) Hegi
UN11	2	44	Unknown	Banovina	-	-	Slovenia	V. vinifera L. subsp. sativa (DC.) Hegi
UN12	2	45	Unknown	Jelovec	-	-	Slovenia	V. vinifera L. subsp. sativa (DC.) Hegi
UN13	2	46	Unknown	Varnica	-	-	Slovenia	V. vinifera L. subsp. sativa (DC.) Hegi
UN14	2	47	Unknown	Skok	-	-	Slovenia	V. vinifera L. subsp. sativa (DC.) Hegi
UN15	2	48	Unknown	Ivek	-	-	Slovenia	V. vinifera L. subsp. sativa (DC.) Hegi
UN16	2	49	Unknown	Gruskovec	-	-	Slovenia	V. vinifera L. subsp. sativa (DC.) Hegi
UN17	2	50	Unknown	Furman	-	-	Slovenia	V. vinifera L. subsp. sativa (DC.) Hegi
UN18	2	51	Unknown	Paradiz	-	-	Slovenia	V. vinifera L. subsp. sativa (DC.) Hegi
UN19	2	52	Unknown	Dolka	-	-	Slovenia	V. vinifera L. subsp. sativa (DC.) Hegi
UN20	2	53	Unknown	Poklek	-	-	Slovenia	V. vinifera L. subsp. sativa (DC.) Hegi
UN21	2	54	Unknown	Halozanka	-	-	Slovenia	V. vinifera L. subsp. sativa (DC.) Hegi
UN22	2	55	Unknown	Viderman	-	-	Slovenia	V. vinifera L. subsp. sativa (DC.) Hegi
UN23	2	56	Unknown	Pecica	-	-	Slovenia	V. vinifera L. subsp. sativa (DC.) Hegi
UN24	2	57	Unknown	Jurjevina	-	-	Slovenia	V. vinifera L. subsp. sativa (DC.) Hegi
UN25	2	58	Unknown	Birna	-	-	Slovenia	V. vinifera L. subsp. sativa (DC.) Hegi
UN26	2	59	Unknown	Rohlin	-	-	Slovenia	V. vinifera L. subsp. sativa (DC.) Hegi
UN27	2	60	Unknown	Martinka	-	-	Slovenia	V. vinifera L. subsp. sativa (DC.) Hegi
UN28	2	61	Unknown	Gruska	-	-	Slovenia	V. vinifera L. subsp. sativa (DC.) Hegi
UN29	2	62	Unknown	Podboc	-	-	Slovenia	V. vinifera L. subsp. sativa (DC.) Hegi
UN30	2	63	Unknown	Zabukovka	-	-	Slovenia	V. vinifera L. subsp. sativa (DC.) Hegi
UN31	2	64	Unknown	Blanca	-	-	Slovenia	V. vinifera L. subsp. sativa (DC.) Hegi
UN32	2	65	Unknown	Planina	-	-	Slovenia	V. vinifera L. subsp. sativa (DC.) Hegi
UN33	2	66	Unknown	Gajka	-	-	Slovenia	V. vinifera L. subsp. sativa (DC.) Hegi
UN34	2	67	Unknown	Cirjan	-	-	Slovenia	V. vinifera L. subsp. sativa (DC.) Hegi
UN35	2	68	Unknown	Antonija	-	-	Slovenia	V. vinifera L. subsp. sativa (DC.) Hegi
UN36	2	69	Unknown	Ledina	-	-	Slovenia	V. vinifera L. subsp. sativa (DC.) Hegi
UN37	2	70	Unknown	Strmec	-	-	Slovenia	V. vinifera L. subsp. sativa (DC.) Hegi
S1	3	71	-	-	-	-	Slovenia/Bric	V. vinifera L. subsp. sylvestris (C. C.Gmelin) Hegi
S2	3	72	-	-	-	-	Slovenia/Bric	V. vinifera L. subsp. sylvestris (C. C.Gmelin) Hegi
S3	3	73	-	-	-	-	Slovenia/Krnice	V. vinifera L. subsp. sylvestris (C. C.Gmelin) Hegi
S4	3	74	-	-	-	-	Slovenia/Krnice	V. vinifera L. subsp. sylvestris (C. C.Gmelin) Hegi
S5	3	75	-	-	-	-	Slovenia/Krnice	V. vinifera L. subsp. sylvestris (C. C.Gmelin) Hegi
S6	3	76	-	-	-	-	Slovenia/Krnice	V. vinifera L. subsp. sylvestris (C. C.Gmelin) Hegi
S7	3	77	-	-	-	-	Slovenia/Vinje-Katarija	V. vinifera L. subsp. sylvestris (C. C.Gmelin) Hegi
S8	3	78	-	-	-	-	Slovenia/Vinje-Katarija	V. vinifera L. subsp. sylvestris (C. C.Gmelin) Hegi
S9	3	79	-	-	-	-	Slovenia/Vinje-Katarija	V. vinifera L. subsp. sylvestris (C. C.Gmelin) Hegi
S10	3	80	-	-	-	-	Slovenia/Vinje-Katarija	V. vinifera L. subsp. sylvestris (C. C.Gmelin) Hegi
S11	3	81	-	-	-	-	Slovenia/Zusem	V. vinifera L. subsp. sylvestris (C. C.Gmelin) Hegi
S12	3	82	-	-	-	-	Slovenia/Rasica	V. vinifera L. subsp. sylvestris (C. C.Gmelin) Hegi
R1	4	83	-	-	-	-	Slovenia	Vitis interspecific crossing
R2	4	84	-	-	-	-	Slovenia	Vitis interspecific crossing
R3	4	85	-	-	-	-	Slovenia	Vitis interspecific crossing
R4	4	86	-	-	-	-	Slovenia	Vitis interspecific crossing
R5	4	87	-	-	-	-	Slovenia	Vitis interspecific crossing
R6	4	88	-	-	-	-	Slovenia	Vitis interspecific crossing
R7	4	89	-	-	-	-	Slovenia	Vitis interspecific crossing
R8	4	90	-	-	-	-	Slovenia	Vitis interspecific crossing
R9	4	91	-	-	SOLONIS	11909	Slovenia	Vitis interspecific crossing
R10	4	92	-	-	TELEKI 9B	27111	Slovenia	Vitis interspecific crossing
R11	4	93	-	-	TELEKI 8B	12326	Slovenia	Vitis interspecific crossing
R12	4	94	-	-	RIPARIA GLOIRE DE MONTPELLIER	4824	Slovenia	Vitis interspecific crossing
R13	4	95	-	-	MILLARDET ET GRASSET 420 A	7810	Slovenia	Vitis interspecific crossing
