# Supplementary material
Source: MDPI journal article supplement (https://www.mdpi.com/2077-0472/14/4/640)
Supplement: s1 [file s1 › Table S3.xlsx]

## Sheet: Q values
Table S3: Q values of 95 samples obtained from Structure software analysis
Label	Accession	Slovenian name	Prime name	Population	V.sylvestris	V.vinifera	Rootstock
1	V1	Šipon	FURMINT	1	0.001	0.998	0.001
2	V2	Zametovka	KOELNER BLAU	1	0.023	0.972	0.005
3	V3	Modri pinot	PINOT NOIR	1	0.648	0.350	0.002
4	V4	Rani rdeči veltlinec	VELTLINER FRUEHROT	1	0.088	0.910	0.002
5	V5	Rdeči veltlinec	VELTLINER ROT	1	0.003	0.995	0.002
6	V6	Laški rizling	WELSCHRIESLING	1	0.133	0.865	0.001
7	V7	Neuburger	NEUBURGER	1	0.006	0.992	0.002
8	V8	Modri naprstnik	AUGSTER BLAU	1	0.002	0.996	0.002
9	V9	Zagajec	BATTTRAUBE	1	0.007	0.991	0.002
10	V10	Velika črnina	BETTLERTRAUBE	1	0.001	0.998	0.001
11	V11	Frankinja	BLAUFRAENKISCH	1	0.003	0.996	0.001
12	V12	Beli kozjak	COARNA ALBA	1	0.002	0.996	0.002
13	V13	Peček	ELBLING WEISS	1	0.245	0.754	0.001
14	V14	Gosjenog	GAENSFUESSER BLAU	1	0.006	0.992	0.002
15	V15	Traminec	GEWUERZTRAMINER	1	0.754	0.245	0.001
16	V16	Trda belina	HARTHEUNISCH	1	0.009	0.990	0.001
17	V17	Belina	HEUNISCH WEISS	1	0.002	0.997	0.001
18	V18	Beli javor	JAVOR WEISS	1	0.001	0.998	0.001
19	V19	Črni šipon	KADARKA KEK	1	0.001	0.998	0.001
20	V20	Bela kavka	KNIPPERLE	1	0.313	0.686	0.001
21	V21	Kraljevina	KOENIGSTRAUBE WEISS	1	0.104	0.894	0.001
22	V22	Topolina	LISZTES FEHER	1	0.006	0.956	0.038
23	V23	Ložinka	PECSI SZAGOS	1	0.005	0.956	0.039
24	V24	Rumeni plavec	PLAVEC ZUTI	1	0.002	0.997	0.001
25	V25	Portugalka	PORTUGIESER BLAU	1	0.099	0.900	0.002
26	V26	Lipna	PRSLJIVKA	1	0.001	0.998	0.001
27	V27	Ranfol	RANFOL BELI	1	0.001	0.998	0.001
28	V28	Svetla belina	SVJETLAK	1	0.002	0.997	0.001
29	V29	Vrbovec	TANTOVINA EICHENBLAETTRIGE	1	0.013	0.983	0.004
30	V30	Volovnik	VELA PERGOLA	1	0.013	0.980	0.007
31	V31	Pelesovna	VULPEA	1	0.003	0.995	0.002
32	V32	Lepa zastavica	ZIERFANDLER ROT	1	0.027	0.969	0.004
33	V33	Vranek	ZIMMETTRAUBE BLAUSCHWARZ	1	0.002	0.997	0.001
34	UN1	Zelenec		2	0.398	0.598	0.004
35	UN2	Topolka		2	0.001	0.998	0.001
36	UN3	Pohorka		2	0.001	0.998	0.001
37	UN4	Okic		2	0.001	0.997	0.001
38	UN5	Pikica		2	0.003	0.996	0.001
39	UN6	Bucanka		2	0.302	0.697	0.001
40	UN7	Pecovka		2	0.002	0.996	0.003
41	UN8	Sojek		2	0.001	0.998	0.001
42	UN9	Habjana		2	0.002	0.997	0.001
43	UN10	Ticna		2	0.001	0.998	0.001
44	UN11	Banovina		2	0.002	0.997	0.001
45	UN12	Jelovec		2	0.011	0.987	0.002
46	UN13	Varnica		2	0.003	0.996	0.001
47	UN14	Skok		2	0.010	0.985	0.005
48	UN15	Ivek		2	0.003	0.996	0.002
49	UN16	Gruskovec		2	0.001	0.998	0.001
50	UN17	Furman		2	0.001	0.998	0.001
51	UN18	Paradiz		2	0.001	0.997	0.001
52	UN19	Dolka		2	0.005	0.993	0.003
53	UN20	Poklek		2	0.002	0.997	0.001
54	UN21	Halozanka		2	0.031	0.960	0.009
55	UN22	Viderman		2	0.002	0.997	0.001
56	UN23	Pecica		2	0.002	0.997	0.001
57	UN24	Jurjevina		2	0.022	0.976	0.002
58	UN25	Birna		2	0.006	0.992	0.002
59	UN26	Rohlin		2	0.001	0.998	0.001
60	UN27	Martinka		2	0.005	0.994	0.001
61	UN28	Gruska		2	0.002	0.996	0.001
62	UN29	Podboc		2	0.458	0.539	0.003
63	UN30	Zabukovka		2	0.007	0.991	0.002
64	UN31	Blanca		2	0.007	0.991	0.002
65	UN32	Planina		2	0.040	0.958	0.003
66	UN33	Gajka		2	0.018	0.977	0.004
67	UN34	Cirjan		2	0.013	0.985	0.002
68	UN35	Antonija		2	0.273	0.726	0.001
69	UN36	Ledina		2	0.006	0.992	0.002
70	UN37	Strmec		2	0.002	0.997	0.001
71	S1	B5		3	0.997	0.002	0.001
72	S2	B6		3	0.995	0.003	0.002
73	S3	KR17		3	0.997	0.002	0.001
74	S4	KR18		3	0.997	0.002	0.001
75	S5	KR19		3	0.995	0.003	0.002
76	S6	KR4		3	0.997	0.002	0.001
77	S7	VK24		3	0.997	0.001	0.001
78	S8	VK25		3	0.996	0.003	0.001
79	S9	VK30		3	0.997	0.002	0.001
80	S10	VK31		3	0.997	0.002	0.001
81	S11	Z1		3	0.997	0.002	0.002
82	S12	R1		3	0.996	0.003	0.001
83	R1	106_P5		4	0.002	0.001	0.997
84	R2	107_P6		4	0.002	0.002	0.996
85	R3	109_P8		4	0.002	0.002	0.996
86	R4	112_P11		4	0.002	0.001	0.997
87	R5	117_P16		4	0.001	0.001	0.998
88	R6	093_KO7		4	0.002	0.001	0.996
89	R7	094_KO8		4	0.003	0.001	0.996
90	R8	50_Vrbina1		4	0.002	0.003	0.995
91	R9	SOLONIS		4	0.030	0.006	0.964
92	R10	TELEKI_9B		4	0.004	0.002	0.995
93	R11	TELEKI___8_B		4	0.018	0.003	0.980
94	R12	RIPARIA_GLOIRE_DE_MONTPELLIER		4	0.001	0.001	0.998
95	R13	MILLARDET_ET_GRASSET__420_A		4	0.005	0.007	0.988
